# Supplementary material for: STN7 Kinase Is Essential for Arabidopsis thaliana Fitness under Prolonged Darkness but Not under Dark-Chilling Conditions
Source: MDPI journal article supplement (doi:10.3390/ijms23094531), 2022-04-20
Supplement: s1 [file s1]

# STN7 Kinase is Essential for *Arabidopsis thaliana* Fitness under Prolonged Darkness but Not under Dark-Chilling Conditions

Anna Węgrzyn, Małgorzata Krysiak, Anna Kulik, Katarzyna B. Gieczewska, Radosław Mazur\*

\*Correspondence: rmazur@uw.edu.pl , Tel: +48-225543213

---

**Table S1.** Densitometric analysis of gel presented in Figure 1

|                                                     | Pea          | Bean         | Col-0        | <i>chs2-1</i> |
|-----------------------------------------------------|--------------|--------------|--------------|---------------|
| Intensity of phosphorylated LHCII band <sup>1</sup> |              |              |              |               |
| 0h                                                  | 125409894.86 | 99479320.12  | 85650175.96  | 52009750.52   |
| 72h                                                 | 135974054.32 | 170718384.78 | 73229857.81  | 65487944.98   |
| Intensity of LHCII band <sup>2</sup>                |              |              |              |               |
| 0h                                                  | 230859183.67 | 210461501.97 | 156952598.43 | 153998304.59  |
| 72h                                                 | 211772249.86 | 227501408.43 | 187553159.98 | 159886558.98  |
| LHCII phosphorylation [%] <sup>3</sup>              |              |              |              |               |
| 0h                                                  | 54.32        | 47.27        | 54.57        | 33.77         |
| 72h                                                 | 64.21        | 75.04        | 39.04        | 40.96         |

<sup>1</sup>Intensity of phosphorylated LHCII (P-LHCII) bands measured on a gel stained with ProQ Diamond (A)

<sup>2</sup>Intensity of LHCII bands measured on a gel stained with Sypro RUBY (B)

<sup>3</sup>LHCII phosphorylation calculated as follows: (A) / (B) × 100.

**Table S2.** Densitometric analysis of blots presented in Figure 2

|                                                     | Col-0         |         |                  |      | chs2-1        |         |                  |      | stn7-1        |         |                  |      | tap38-2       |         |                  |      |
|-----------------------------------------------------|---------------|---------|------------------|------|---------------|---------|------------------|------|---------------|---------|------------------|------|---------------|---------|------------------|------|
|                                                     | Raw data      |         | Normalized to 0h |      | Raw data      |         | Normalized to 0h |      | Raw data      |         | Normalized to 0h |      | Raw data      |         | Normalized to 0h |      |
|                                                     | Dark-chilling | Dark    | Dark-chilling    | Dark |
| Intensity of phosphorylated CP43 band <sup>1</sup>  |               |         |                  |      |               |         |                  |      |               |         |                  |      |               |         |                  |      |
| 0h                                                  | 2379997       | 1648049 | 1.00             | 1.00 | 1438586       | 1042759 | 1.00             | 1.00 | 3366942       | 1940590 | 1.00             | 1.00 | 2894675       | 3817023 | 1.00             | 1.00 |
| 3h                                                  | 3008365       | 1790541 | 1.26             | 1.09 | 1489758       | 1474347 | 1.04             | 1.41 | 3459382       | 4081471 | 1.03             | 2.10 | 2829135       | 3605117 | 0.98             | 0.94 |
| 6h                                                  | 2856697       | 1843745 | 1.20             | 1.12 | 1409794       | 1955171 | 0.98             | 1.87 | 3556670       | 3334255 | 1.06             | 1.72 | 2783327       | 2689750 | 0.96             | 0.70 |
| 9h                                                  | 2701617       | 1653797 | 1.14             | 1.00 | 1638874       | 1853603 | 1.14             | 1.78 | 2654818       | 3468555 | 0.79             | 1.79 | 2476507       | 2726354 | 0.86             | 0.71 |
| 12h                                                 | 3606219       | 2065741 | 1.52             | 1.25 | 2098426       | 1544643 | 1.46             | 1.48 | 3273370       | 3999663 | 0.97             | 2.06 | 2563571       | 2740982 | 0.89             | 0.72 |
| 24h                                                 | 2485019       | 1667621 | 1.04             | 1.01 | 1377614       | 1679527 | 0.96             | 1.61 | 3353906       | 2644291 | 1.00             | 1.36 | 2375387       | 3106732 | 0.82             | 0.81 |
| 48h                                                 | 3100179       | 1501705 | 1.30             | 0.91 | 1568590       | 1649399 | 1.09             | 1.58 | 2948286       | 2310935 | 0.88             | 1.19 | 2487387       | 3040962 | 0.86             | 0.80 |
| 72h                                                 | 2962339       | 1425337 | 1.24             | 0.86 | 2093490       | 1769983 | 1.46             | 1.70 | 2906790       | 2510383 | 0.86             | 1.29 | 3204386       | 2993216 | 1.11             | 0.78 |
| Intensity of phosphorylated D1/D2 band <sup>1</sup> |               |         |                  |      |               |         |                  |      |               |         |                  |      |               |         |                  |      |
| 0h                                                  | 2465485       | 1967510 | 1.00             | 1.00 | 1240550       | 646664  | 1.00             | 1.00 | 3964332       | 2051185 | 1.00             | 1.00 | 3722860       | 4315753 | 1.00             | 1.00 |
| 3h                                                  | 2527387       | 2186470 | 1.03             | 1.11 | 1460686       | 1276184 | 1.18             | 1.97 | 4098087       | 4584421 | 1.03             | 2.24 | 3483876       | 4296831 | 0.94             | 1.00 |
| 6h                                                  | 2788571       | 2419350 | 1.13             | 1.23 | 1001958       | 1353200 | 0.81             | 2.09 | 4011503       | 4328705 | 1.01             | 2.11 | 3476316       | 3456348 | 0.93             | 0.80 |
| 9h                                                  | 2891691       | 2317782 | 1.17             | 1.18 | 1269722       | 1498448 | 1.02             | 2.32 | 2699007       | 4486117 | 0.68             | 2.19 | 3431620       | 4236504 | 0.92             | 0.98 |
| 12h                                                 | 3747943       | 2427398 | 1.52             | 1.23 | 1662382       | 1522156 | 1.34             | 2.35 | 3118479       | 4485769 | 0.79             | 2.19 | 3402028       | 3963860 | 0.91             | 0.92 |
| 24h                                                 | 2132739       | 2603858 | 0.87             | 1.32 | 1341234       | 1484116 | 1.08             | 2.30 | 2954807       | 3577701 | 0.75             | 1.74 | 3033920       | 4829775 | 0.81             | 1.12 |
| 48h                                                 | 2321503       | 2724114 | 0.94             | 1.38 | 1556638       | 1374176 | 1.25             | 2.13 | 2778311       | 2819261 | 0.70             | 1.37 | 2780820       | 5005040 | 0.75             | 1.16 |
| 72h                                                 | 2432879       | 2423974 | 0.99             | 1.23 | 2254327       | 1790723 | 1.82             | 2.77 | 2733839       | 3187205 | 0.69             | 1.55 | 2702768       | 4378334 | 0.73             | 1.01 |
| Intensity of phosphorylated LHCII band <sup>1</sup> |               |         |                  |      |               |         |                  |      |               |         |                  |      |               |         |                  |      |
| 0h                                                  | 1021389       | 931602  | 1.00             | 1.00 | 749019        | 391788  | 1.00             | 1.00 | –             | –       | –                | –    | 1544377       | 1226032 | 1.00             | 1.00 |
| 3h                                                  | 972865        | 844786  | 0.95             | 0.91 | 1047411       | 900204  | 1.40             | 2.30 | –             | –       | –                | –    | 1309925       | 1324962 | 0.85             | 1.08 |
| 6h                                                  | 993249        | 1268218 | 0.97             | 1.36 | 649711        | 1271384 | 0.87             | 3.25 | –             | –       | –                | –    | 1701189       | 1059135 | 1.10             | 0.86 |
| 9h                                                  | 788337        | 902894  | 0.77             | 0.97 | 842407        | 886356  | 1.12             | 2.26 | –             | –       | –                | –    | 1330469       | 936708  | 0.86             | 0.76 |
| 12h                                                 | 1962177       | 519390  | 1.92             | 0.56 | 1176055       | 806320  | 1.57             | 2.06 | –             | –       | –                | –    | 1120317       | 622673  | 0.73             | 0.51 |
| 24h                                                 | 735361        | 1208838 | 0.72             | 1.30 | 824551        | 1536160 | 1.10             | 3.92 | –             | –       | –                | –    | 747969        | 1144700 | 0.48             | 0.93 |
| 48h                                                 | 703813        | 1583378 | 0.69             | 1.70 | 872659        | 1427524 | 1.17             | 3.64 | –             | –       | –                | –    | 514961        | 1093728 | 0.33             | 0.89 |
| 72h                                                 | 1016837       | 2056886 | 1.00             | 2.21 | 1113027       | 2423272 | 1.49             | 6.19 | –             | –       | –                | –    | 452977        | 2542955 | 0.29             | 2.07 |
| Intensity of Lhcb1 band <sup>2</sup>                |               |         |                  |      |               |         |                  |      |               |         |                  |      |               |         |                  |      |
| 0h                                                  | 1882955       | 1244634 | 1.00             | 1.00 | 2682156       | 264555  | 1.00             | 1.00 | 1906739       | 1398460 | 1.00             | 1.00 | 2292140       | 610002  | 1.00             | 1.00 |
| 3h                                                  | 1848806       | 1190178 | 0.98             | 0.96 | 3185646       | 245187  | 1.19             | 0.93 | 2038491       | 1740085 | 1.07             | 1.24 | 3061416       | 670590  | 1.34             | 1.10 |
| 6h                                                  | 2029536       | 933682  | 1.08             | 0.75 | 3080412       | 368739  | 1.15             | 1.39 | 2260483       | 2173260 | 1.19             | 1.55 | 2648216       | 554854  | 1.16             | 0.91 |
| 9h                                                  | 2103682       | 1032288 | 1.12             | 0.83 | 3144046       | 405399  | 1.17             | 1.53 | 1924259       | 2352619 | 1.01             | 1.68 | 2610936       | 645486  | 1.14             | 1.06 |
| 12h                                                 | 2288433       | 1224826 | 1.22             | 0.98 | 3114121       | 477204  | 1.16             | 1.8  | 2216245       | 2394667 | 1.16             | 1.71 | 3100820       | 565134  | 1.35             | 0.93 |
| 24h                                                 | 1755215       | 894865  | 0.93             | 0.72 | 3677336       | 414563  | 1.37             | 1.57 | 2012073       | 2156666 | 1.06             | 1.54 | 3682452       | 473748  | 1.61             | 0.78 |
| 48h                                                 | 1652403       | 769874  | 0.88             | 0.62 | 3229701       | 340040  | 1.2              | 1.29 | 1705713       | 2238093 | 0.89             | 1.60 | 3466496       | 610124  | 1.51             | 1.00 |
| 72h                                                 | 1765181       | 962289  | 0.94             | 0.77 | 3537168       | 327639  | 1.32             | 1.24 | 1392261       | 2066354 | 0.73             | 1.48 | 4771211       | 741828  | 2.08             | 1.22 |

<sup>1</sup> bands intensities of phosphorylated forms of CP43, D1/D2, and LHCII proteins were measured on an anti-phospho-threonine blot using ImageLab software<sup>2</sup> bands intensities of Lhcb1 protein were measured on an anti-Lhcb1 blot using ImageLab software.

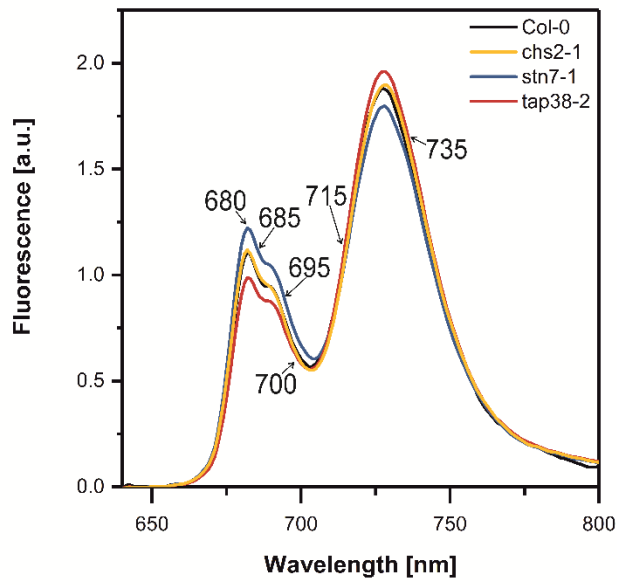

**Figure S1.** Low temperature chlorophyll *a* fluorescence emission spectra of thylakoid membranes. Crude thylakoid fractions were isolated from wild type Col-0, *chs2-1*, *stn7-1*, and *tap38-2* lines of Arabidopsis plants from control conditions (time-point 0h). Emission maxima of the main components of the spectrum are indicated by arrows (details in the main text).

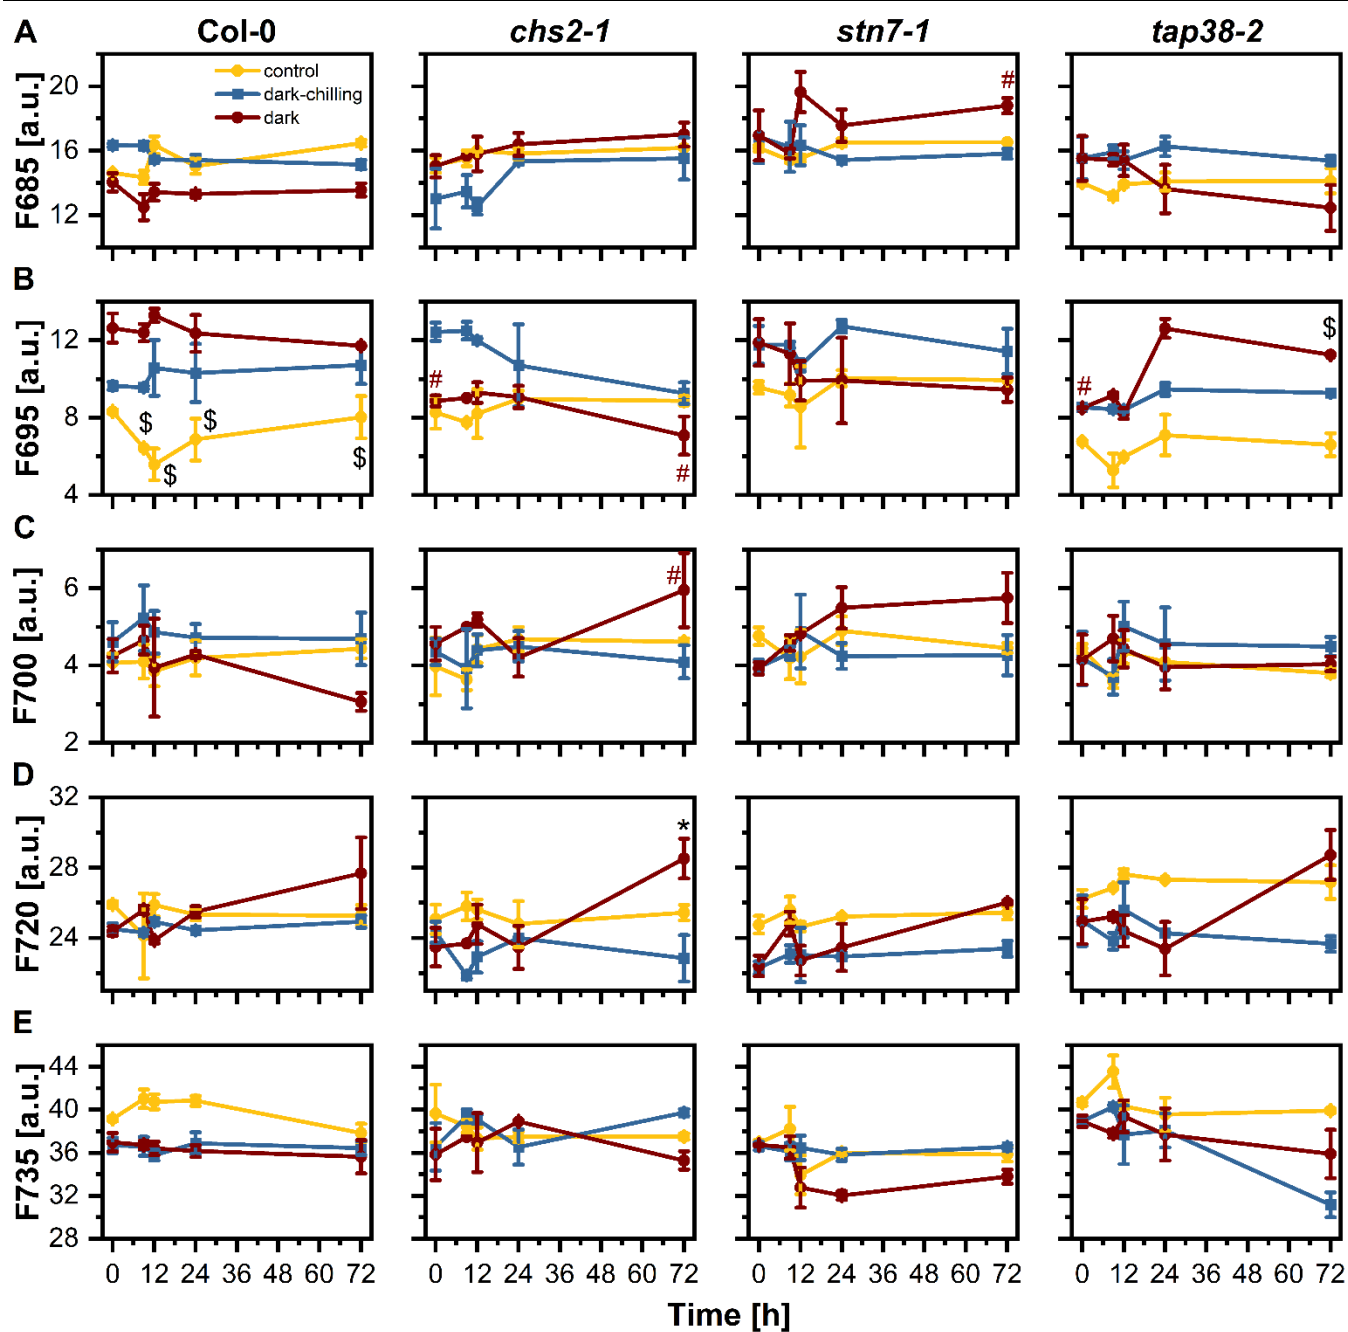

**Figure S2.** Changes of five main fluorescence bands contributions to low-temperature chlorophyll *a* fluorescence emission spectra of thylakoid membranes isolated from wild type Col-0, *chs2-1*, *stn7-1*, and *tap38-2* lines of Arabidopsis plants from control, dark-chilling, and dark conditions. Fluorescence bands F685 (A), F695 (B), F700 (C), F720 (D), and F735 (E) were obtained by Gaussian deconvolution of the recorded spectra. Data are mean values  $\pm$  SE from two independent experiments. Results marked with an (i) asterisk, (ii) dollar, and (iii) hash differ significantly at  $p = 0.1$  (one-way ANOVA with post hoc Tukey test for time-points 0 h and 72 h): (i) dark-chilling vs. dark conditions (ii) dark vs. control conditions, (iii) mutant vs. wild type, respectively. The color code for statistics is the same as for the data.

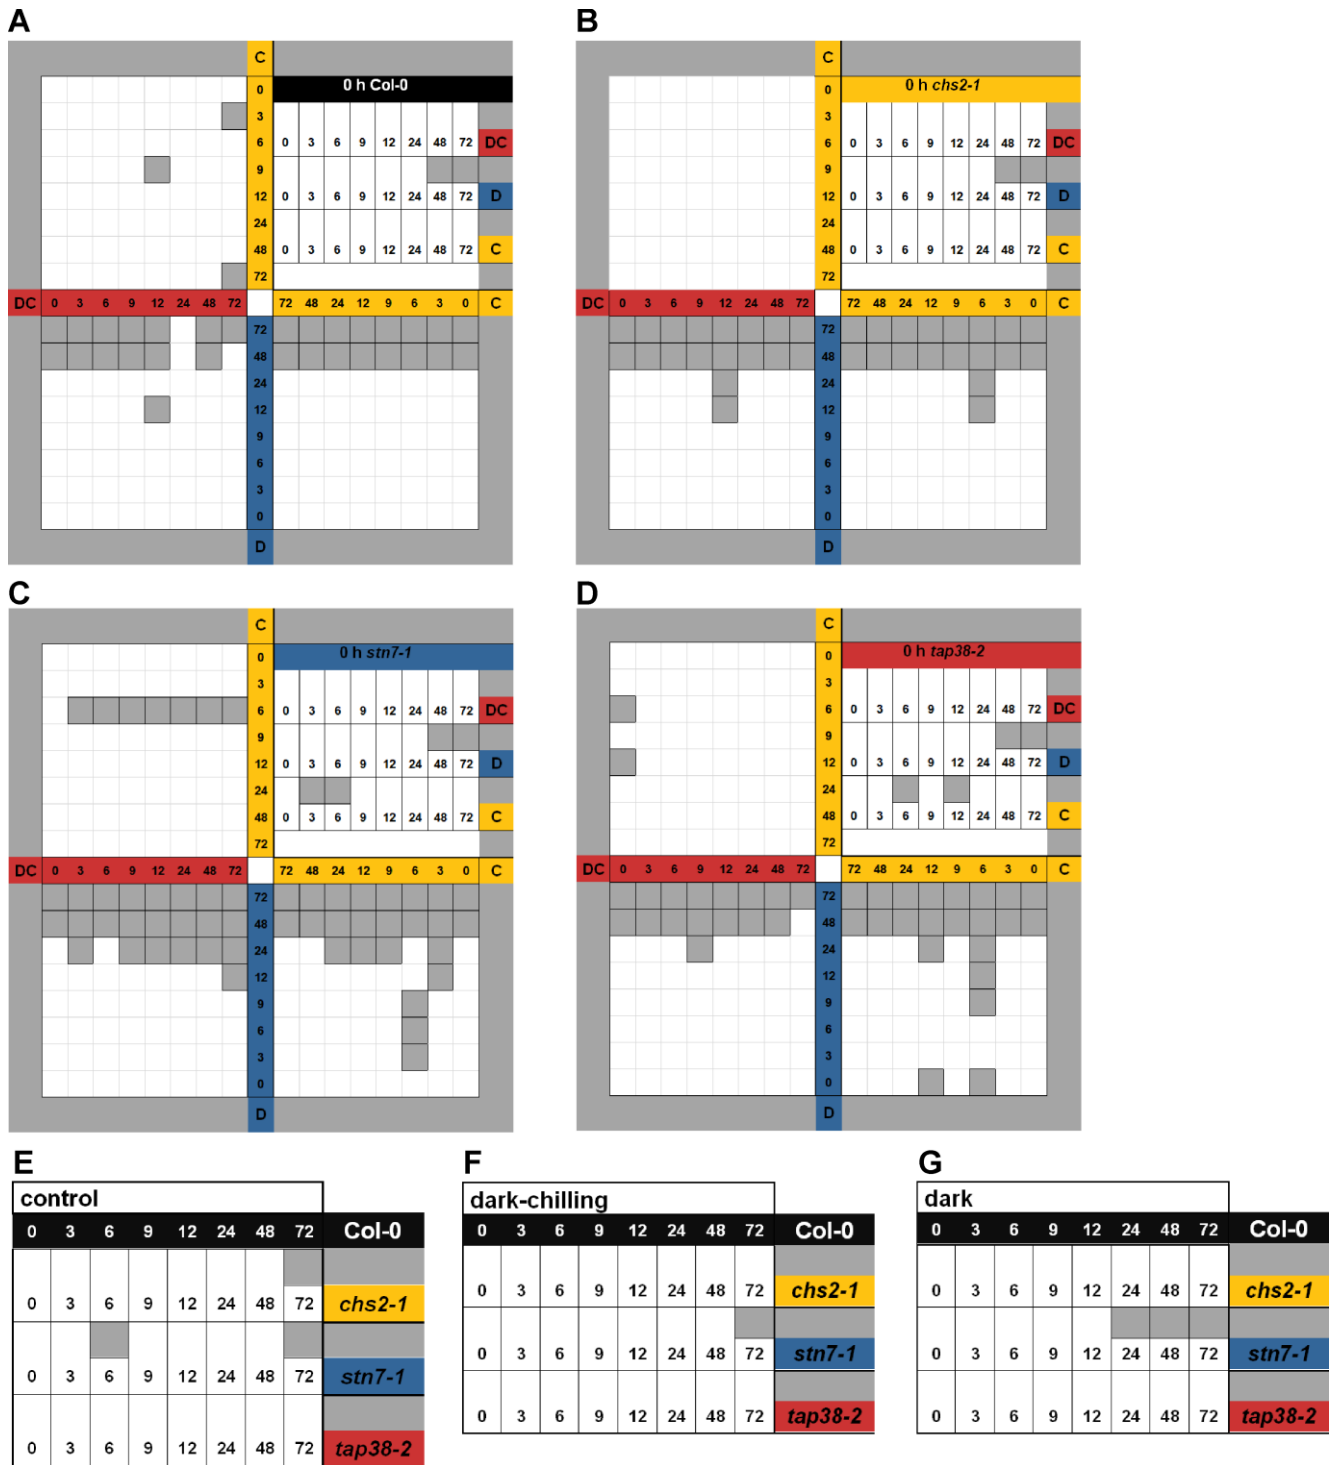

**Figure S3.** The statistical significance (one-way ANOVA with post hoc Tukey test at  $p = 0.05$ ) of the changes in  $F_v/F_m$  is presented in Figure 6 in the main text. A-D, graphs show the significance of  $F_v/F_m$  differences, marked as grey shade, in Col-0 (A), *chs2-1* (B), *stn7-1* (C), and *tap38-2* (D) in control vs. dark-chilling (top left), control vs. dark (bottom right) and dark-chilling vs. dark (bottom left) conditions. The top right panel of each graph (A-D) shows significant differences between time-point and 0 h, separately for all analyzed lines. E-G, graphs show significant differences mutant vs. Col-0 in control (E), dark-chilling (F), and dark (G) conditions.

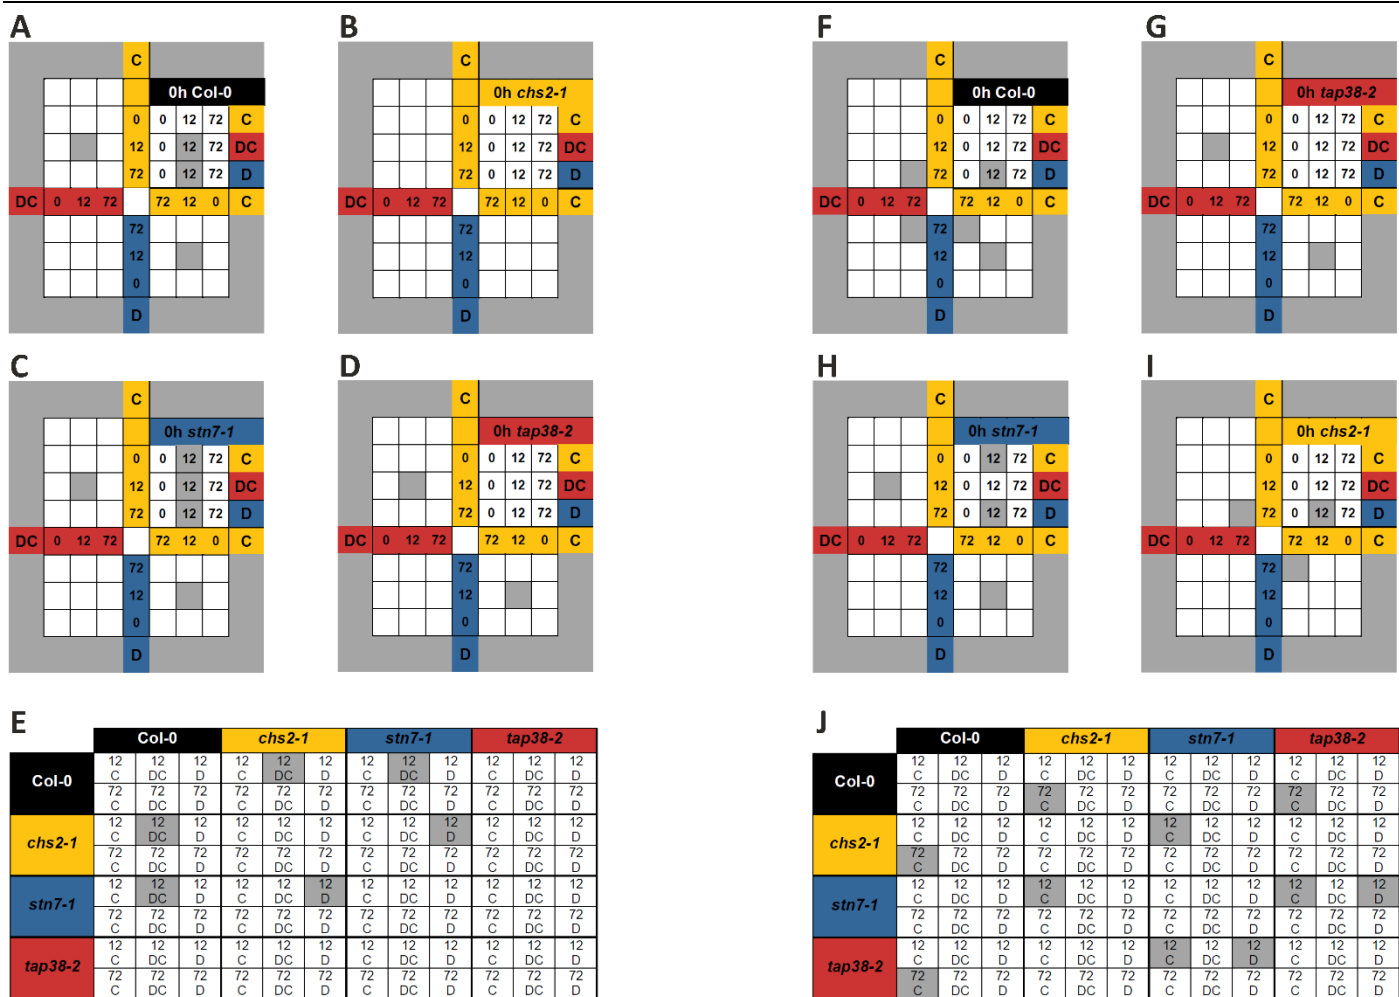

**Figure S4.** The statistical significance (one-way ANOVA with post hoc Tukey test at  $p = 0.05$ ) of the changes in NPQ is presented in Figure 7 in the main text. Graphs show the significance of steady-state NPQ (A-E) and maximal NPQ (F-J) differences, marked as grey shade, in Col-0 (A, F), *chs2-1* (B, G), *stn7-1* (C, H), and *tap38-2* (D, I) in control vs. dark-chilling (top left), control vs. dark (bottom right) and dark-chilling vs. dark (bottom left) conditions. The top right panel of each graph (A-D and F-I) shows significant differences between time-point and 0 h, separately for all analyzed lines. E and J graphs show significant differences in mutant vs. Col-0 in all experimental conditions.

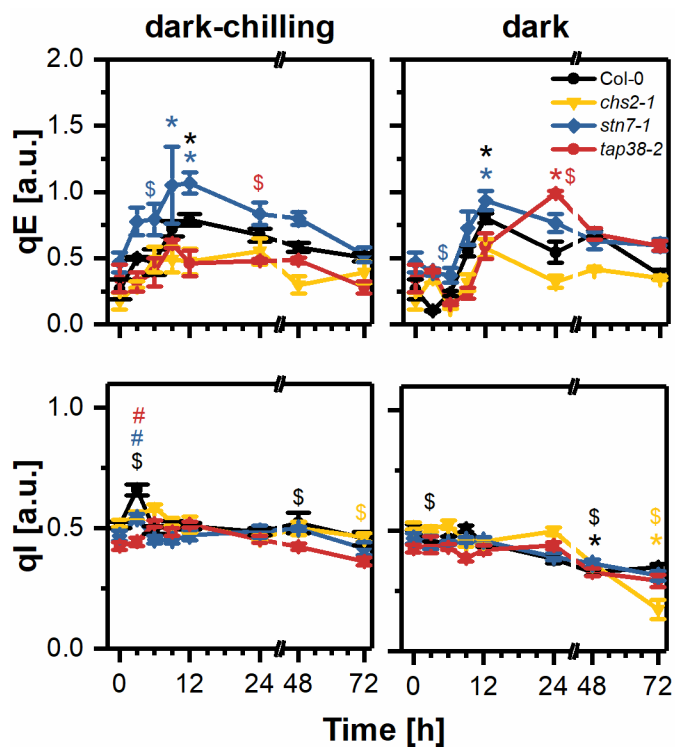

**Figure S5.** Changes in qE and qI components of NPQ. qE and qI were calculated for wild type Col-0, *chs2-1*, *stn7-1*, and *tap38-2* lines of Arabidopsis plants from dark-chilling and dark conditions. Data are mean values  $\pm$  SE from three independent experiments. Results marked with an (i) asterisk, (ii) hash, and (iii) dollar differ significantly at  $p = 0.05$  (one-way ANOVA with post hoc Tukey test): (i) time-point vs. 0 h within the plant line and experimental conditions, (ii) mutant vs. Col-0 within the time-point and experimental conditions, (iii) dark-chilling vs. dark conditions within plant line and time-point, respectively. The color code for statistics is the same as for the data.

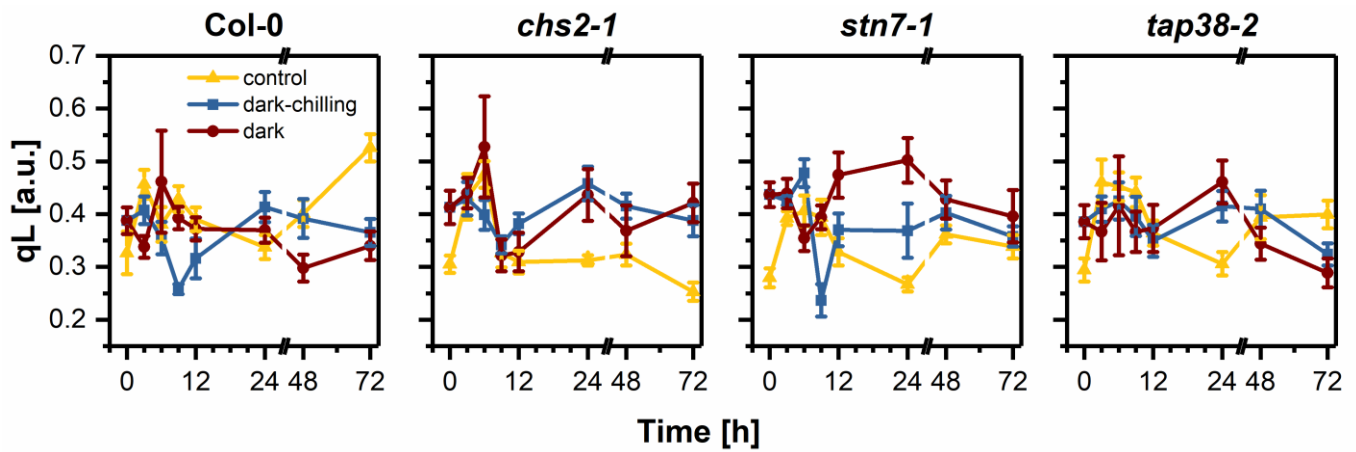

**Figure S6.** Changes in  $qL$  (parameter representing the fraction of open PSII reaction centers) were calculated for light-adapted plants of Col-0, *chs2-1*, *stn7-1*, and *tap38-2* lines of Arabidopsis plants from control, dark-chilling, and dark conditions. Data are mean values  $\pm$  SE from three independent experiments. Significant differences in one-way ANOVA with post hoc Tukey test at  $p = 0.05$  were not reported.

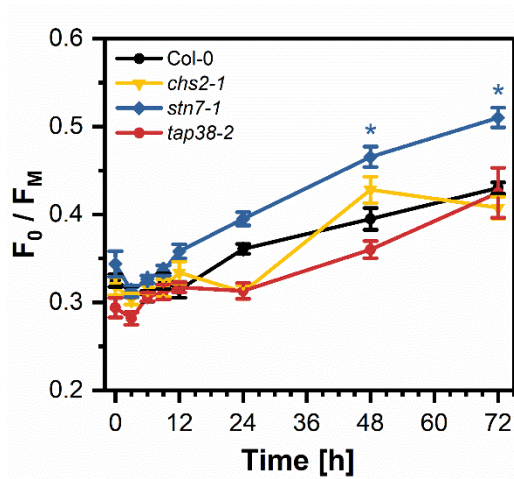

**Figure S7.** Changes in  $F_0/F_M$  values in Col-0, *chs2-1*, *stn7-1*, and *tap38-2* lines of Arabidopsis plants from dark conditions. Data are mean values  $\pm$  SE from three independent experiments. Results (mutant vs. Col-0 within time-point) marked with an asterisk differ significantly at  $p = 0.05$  (one-way ANOVA with post hoc Tukey test) mutant vs. Col-0. The color code for statistics is the same as for the data.
